# Supplementary material for: Farnesoid X receptor associates with β-catenin and inhibits its activity in hepatocellular carcinoma
Source: PubMed Central journal article supplement (PMC4414185; doi:10.18632/oncotarget.2899), 2015-02-09
Supplement: oncotarget-06-4226-s001.pdf [file oncotarget-06-4226-s001.pdf]

## SUPPLEMENTARY FIGURES

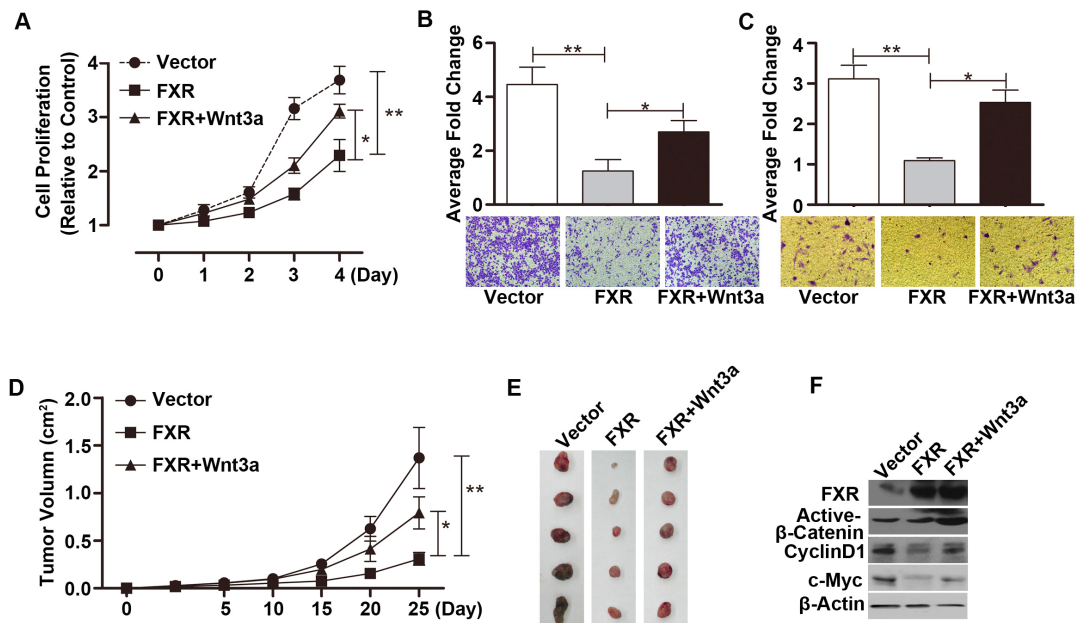

**Supplementary Figure S1: Overexpression of FXR inhibited HCCLM3 cells oncogenic behavior via Wnt/β-Catenin.** (A, B and C) Over-expression of FXR in HCCLM3 cells suppressed cell growth (A), migration (B) and invasion (C) as detected with MTT, Transwell migration and Matrigel invasion assay respectively. And simultaneous treatment with Wnt3a could partially reverse this effect. (D and E) Nude mice were subcutaneously injected with HCCLM3 cells ( $2.5 \times 10^6$ ) over-expressing either FXR, or FXR in combination with Wnt3a. Tumor volume was measured and tumor mass was excised and imaged at indicated time after injection. Ectopic FXR expression in HCCLM3 cells decreased tumor xenograft growth *in vivo*. Whereas, activation of β-Catenin by constitutively expressing Wnt3a reversed FXR mediated tumor suppression. (F) Expression level of FXR, active-β-Catenin, CyclinD1 and c-Myc in the excised tumor samples from nude mice was determined by Western blot. Error bars represent  $\pm$  SEM from three independent samples. \*,  $p < 0.01$ ; \*\*,  $p < 0.001$ .

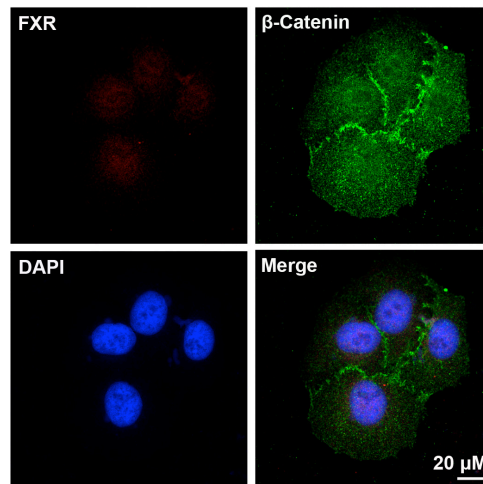

Hu7/ FXR shRNA

**Supplementary Figure S2:  $\beta$ -Catenin distribution in Huh7/FXR shRNA cells.** Huh7 cells stably expressing pLKO.1 shRNA FXR were double stained with monoclonal anti-FXR antibody and polyclonal  $\beta$ -Catenin antibody. Together with Figure 2D, knockdown of FXR expression did not change the localization of  $\beta$ -Catenin. Scale bar = 20  $\mu$ m.

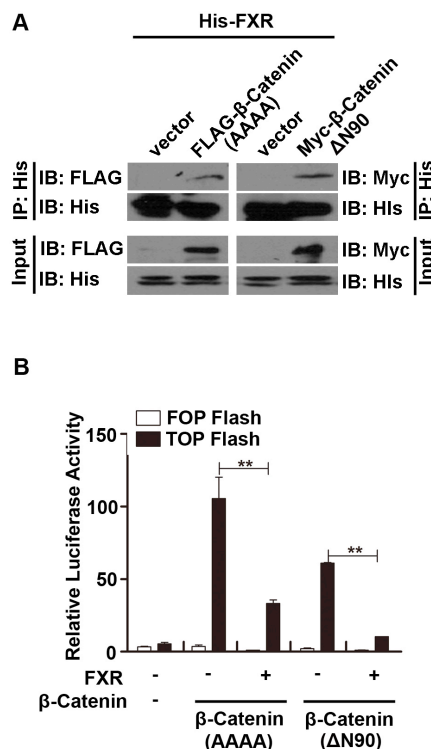

**Supplementary Figure S3: FXR interacted with the oncogenic  $\beta$ -Catenin mutants and inhibited the transcriptional activity.** (A) FXR bound with  $\beta$ -Catenin oncogenic mutants (S33A/S37A/T41A/S45A and  $\Delta$ N90). Immunoprecipitation was carried out using Nickel beads in lysates from HEK293T cells co-transfected with His-FXR and FLAG- $\beta$ -Catenin (S33A/S37A/T41A/S45A) or Myc- $\beta$ -Catenin ( $\Delta$ N90).  $\beta$ -Catenin mutants was detected using antibodies against FLAG or Myc respectively. (B) FXR suppressed  $\beta$ -Catenin oncogenic mutants (S33A/S37A/T41A/S45A and  $\Delta$ N90) mediated transcriptional activity. HEK293T cells were transfected with TOPflash reporter (0.1  $\mu$ g DNA), FXR and  $\beta$ -Catenin mutants (S33A/S37A/T41A/S45A or  $\Delta$ N90). Luciferase activity was measured using cell lysates 24 hours after transfection. Reporter activity was normalized by pRL-TK luciferase activity. Error bars represent  $\pm$  SEM of three independent samples. \*,  $p < 0.01$ ; \*\*,  $p < 0.001$ .
